# Supplementary material for: Consumer Acceptance of Plant-Based Meat Substitutes: A Narrative Review
Source: MDPI journal article supplement (doi:10.3390/foods11091274), 2022-04-27
Supplement: s1 [file s1]

**Table S1.** Main features of the studies reviewed.

|    | Authors                              | Methods                                                   | Sample                   | Focus (with the original description)                                             | Region                |
|----|--------------------------------------|-----------------------------------------------------------|--------------------------|-----------------------------------------------------------------------------------|-----------------------|
| 1  | Arora et al. (2020) [37]             | discrete choice experiment                                | 394                      | conventional meat, plant-based meat, cell-based meat, and chickpeas               | India                 |
| 2  | BEUC (2020) [58]                     | survey                                                    | 11 000                   | sustainable food, which included plant-based meat                                 | Europe (11 countries) |
| 3  | Broeckhoven et al. (2021) [59]       | discrete choice experiment                                | 2 500                    | protein-enriched burgers                                                          | Europe (5 countries)  |
| 4  | Bryant et al. (2019) [39]            | ANOVA and linear regression by country                    | 3 030                    | plant-based meat, cultured meat                                                   | USA, India, China     |
| 5  | Circus and Robison (2019) [21]       | interviews and online survey                              | 7 interview, 139 surveys | plant-based meat, cultured meat, edible insects                                   | not explicitly stated |
| 6  | De Marchi et al. (2021) [33]         | nutritional profiling                                     | -                        | meat-based burgers and plant-based burgers                                        | -                     |
| 7  | Edge and Garrett (2020) [28]         | nutritional profiling                                     | -                        | plant-based burgers                                                               | -                     |
| 8  | Fiorentini et al. (2020) [67]        | review                                                    | -                        | plant-based meat analogs and meat extenders                                       | -                     |
| 9  | Goldstein et al. (2017) [38]         | life cycle assessment (LCA)                               | -                        | plant-based burger                                                                | USA                   |
| 10 | Hwang et al. (2020) [27]             | linear regression                                         | 504                      | plant-based meat, cultured meat                                                   | Korea                 |
| 11 | IFIC (2019) [53]                     | online interviews                                         | 1 000                    | plant alternatives                                                                | USA                   |
| 12 | IFIC (2020b) [56]                    | online interviews                                         | 1 000                    | plant alternatives                                                                | USA                   |
| 13 | IFIC (2020c) [57]                    | online interviews                                         | 1 000                    | plant alternatives                                                                | USA                   |
| 14 | IFIC (2021a) [54]                    | online interviews                                         | 1 001                    | plant-based meat alternatives                                                     | USA                   |
| 15 | IFIC (2021b) [30]                    | online interviews                                         | 1 009                    | protein                                                                           | USA                   |
| 16 | Krings (2022) [55]                   | ANOVA                                                     | 655                      | regular meat, clean meat, plant-based meat                                        | Not stated            |
| 17 | Michel et al. (2021) [18]            | ANOVA                                                     | 1 039                    | general meat alternatives                                                         | Germany               |
| 18 | Motoki et al. (2022) [26]            | ANOVA and linear regression                               | 117, 108 and 120         | plant-based meat, cultured meat, edible insects, 3D printed foods                 | Japan                 |
| 19 | Profeta et al. (2021) [23]           | discrete choice experiment                                | 500 and 501              | meathybrids                                                                       | Germany, Belgium      |
| 20 | Rubio et al. (2020) [8]              | review                                                    | -                        | plant-based and cell-based meat                                                   | -                     |
| 21 | Saerens et al. (2021) [65]           | life cycle assessment (LCA)                               | -                        | plant-based burger patties from different ingredients with different technologies | -                     |
| 22 | Schouteten et al. (2016) [32]        | emotional and sensory profiles of products, ANOVA, t-test | 97                       | meat-based, plant-based and insect-based burgers                                  | not explicitly stated |
| 23 | Slade (2018) [31]                    | discrete choice experiment                                | 533                      | plant-based meat, cultured meat burger, conventional meat burger                  | not explicitly stated |
| 24 | Smart Protein (2021a, 2021b) [34,46] | online survey                                             | 7 590                    | plant-based food                                                                  | Europe (10 countries) |
| 25 | Sucapane et al. (2021) [69]          | ANOVA, t-test                                             | 149, 182 and 368         | plant-based meat                                                                  | USA, Canada           |
| 26 | Szejda et al., 2021 [17]             | linear regression                                         | 959                      | plant-based meat, cultured meat                                                   | South-Africa          |
| 27 | Tosun et al., 2020 [22]              | content analysis                                          | -                        | meat substitutes in general (but mostly plant-based protein)                      | Turkey                |
| 28 | Van Loo et al. (2020) [29]           | discrete choice experiment                                | 1 830                    | meat burger (beef), plant-based (heme-protein and pea protein), cultured meat     | USA                   |

Notes: The names in the "Focus (with the original description)" column follow the description used in the original studies. Source: authors' own collection (2021).
